# Supplementary material
Source: PubMed Central journal article supplement (PMC10117527)
Supplement: NIHMS1852219-supplement-Cover_Letter.pdf [file NIHMS1852219-supplement-Cover_Letter.pdf]

Cornea and Refractive Surgery  
Massachusetts Eye and Ear  
243 Charles Street, Boston, MA 02114  
Tel: 617.573.3113  
Fax: 617.573.4300

**Thomas H. Dohlman, MD**  
*Assistant Professor, Harvard Medical School*  
*Physician and Surgeon, Massachusetts Eye and Ear Infirmary*  
Email: Thomas\_Dohlman@meci.harvard.edu

Laboratory of Immunology,  
Transplantation & Regeneration  
20 Staniford Street, Boston, MA 02114  
Tel: 617-912-7489  
Fax: 617-912-0117

Editorial Board  
Cornea

October 25, 2022

Dear Editorial Board:

As the corresponding author and on behalf of my co-authors, please find enclosed a revision of the manuscript “Descemet Stripping Only (DSO) Technique for Corneal Endothelial Damage in Mice” to be considered for publication in *Cornea* as an original research article.

We have addressed all comments and questions raised by the reviewers and we appreciate the time and effort of the editorial board and reviewers.

Sincerely,



Thomas Dohlman, MD
